# Supplementary material
Source: publisher figshare collection journal article supplement (https://sage.figshare.com/ndownloader/files/18496994)
Supplement: Supplementary file 1 [file 18496994]

| Subject ID | Group | Reaction Time (ms) | | Accuracy (%) | |
| --- | --- | --- | --- | --- | --- |
| Con | Incon | Con | Incon |
| S1 | CP | 1106 | 1216 | 95 | 56 |
| S2 | CP | 1659 | 1789 | 82 | 76 |
| S3 | CP | 976 | 1010 | 100 | 98 |
| S4 | CP | 539 | 645 | 100 | 100 |
| S5 | CP | 942 | 988 | 100 | 99 |
| S6 | CP | 889 | 1081 | 85 | 73 |
| S7 | CP | 1391 | 1415 | 87 | 48 |
| S8 | CP | 903 | 868 | 92 | 91 |
| S9 | CP | 808 | 941 | 98 | 97 |
| S10 | CP | 1102 | 1050 | 91 | 90 |
| S11 | CP | 775 | 809 | 96 | 98 |
| S12 | CP | 867 | 935 | 99 | 93 |
| S13 | TD | 723 | 733 | 92 | 94 |
| S14 | TD | 771 | 813 | 100 | 99 |
| S15 | TD | 860 | 960 | 99 | 98 |
| S16 | TD | 600 | 612 | 100 | 100 |
| S17 | TD | 578 | 636 | 100 | 99 |
| S18 | TD | 857 | 903 | 100 | 97 |
| S19 | TD | 733 | 782 | 100 | 98 |
| S20 | TD | 878 | 871 | 97 | 98 |
| S21 | TD | 693 | 764 | 100 | 99 |
| S22 | TD | 618 | 703 | 98 | 96 |
| S23 | TD | 584 | 634 | 100 | 100 |
| S24 | TD | 473 | 576 | 100 | 99 |
| S25 | TD | 442 | 478 | 100 | 100 |
| S26 | TD | 949 | 924 | 97 | 97 |
| S27 | TD | 453 | 786 | 100 | 100 |
| S28 | TD | 654 | 689 | 100 | 100 |
| S29 | TD | 667 | 765 | 98 | 100 |
| S30 | TD | 633 | 690 | 99 | 99 |
| S31 | TD | 598 | 647 | 99 | 100 |
| S32 | TD | 696 | 731 | 100 | 100 |
| S33 | TD | 723 | 737 | 99 | 98 |
| S34 | TD | 654 | 783 | 97 | 97 |
| S35 | TD | 527 | 537 | 100 | 99 |
| S36 | TD | 552 | 566 | 100 | 98 |
| S37 | TD | 700 | 741 | 99 | 97 |
| S38 | TD | 717 | 749 | 98 | 96 |
|  |  |  |  |  |  |
|  |  |  |  |  |  |
|  |  |  |  |  |  |
|  |  |  |  |  |  |
|  |  |  |  |  |  |
|  |  |  |  |  |  |

**Supplemental Table 1**: Individual reaction time and accuracy results. Abbreviations: Con = Congruent condition; Incon= Incongruent condition;
